# Supplementary material for: Synthesis and investigation of a novel luminous hydrogel
Source: Royal Society of Chemistry journal article supplement (doi:10.1039/c6py00749j), 2016-01-01
Supplement: c6py00749j1.pdf [file c6py00749j1.pdf]

### Supporting Information

Fig. s1.  $^1\text{H}$  NMR spectrum of Poly (VAc-co-Eu(DBM)<sub>2</sub>(Phen)(MA)) (PVEDPM2)

Fig. s2.  $^{13}\text{C}$  NMR spectrum of Poly (VAc-co-Eu(DBM)<sub>2</sub>(Phen)(MA)) (PVEDPM2)

Fig. s3.  $^1\text{H}$  NMR spectrum of Poly (VA-co-Eu(DBM)<sub>2</sub>(Phen)(MA)) (PVAEDPM2)

Fig. s4.  $^{13}\text{C}$  NMR spectrum of Poly (VA-co-Eu(DBM)<sub>2</sub>(Phen)(MA)) (PVAEDPM2)

Fig. s5. The hydrophilic photos of PVAEDPM2 hydrogels (a) before contacting with water droplet (b) after contacting with water droplet.

Fig. s6. Representative stress-strain curves for polymer hydrogels of (a) PVAEDPM2 (solid content 10%, PVAEDPM 2:PVA=4:1) and (b) PVA (solid content 10%).

Table s1. Water content of the PVAEDPM2 hydrogels.

Table s2. Swelling ratio of the PVAEDPM2 hydrogels.

Table s3. Analytical results of  $\text{Eu}^{3+}$  in SBF solution after soaking PVAEDPM2 hydrogels for a month.

Fig. s1.

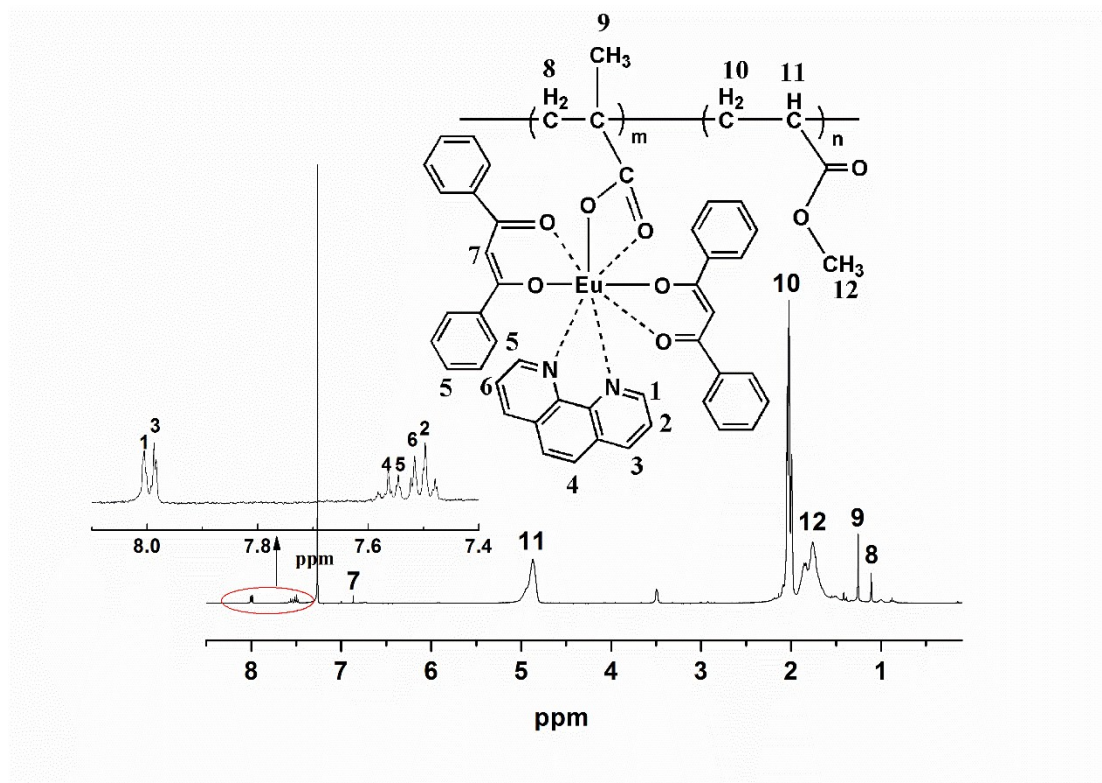

Fig. s2.

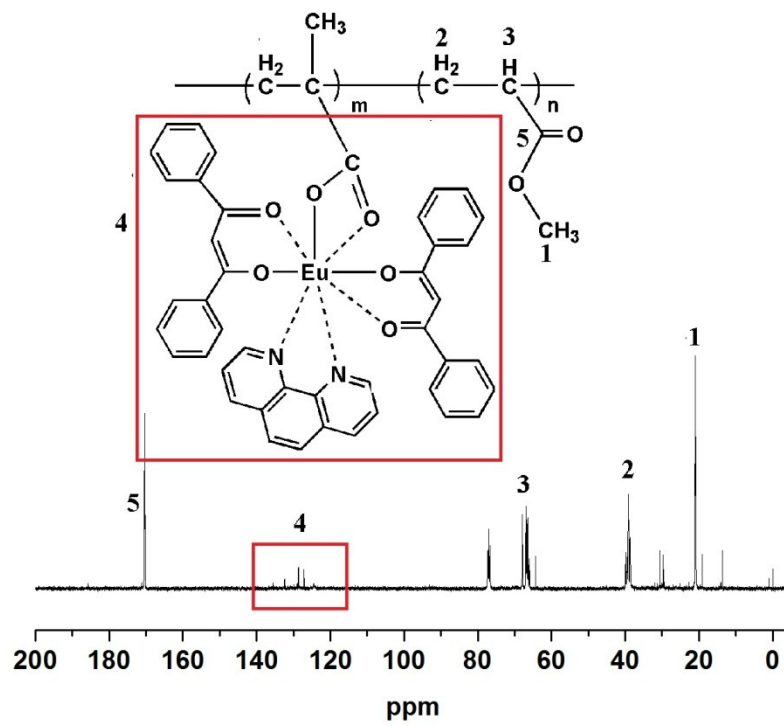

Fig. s3.

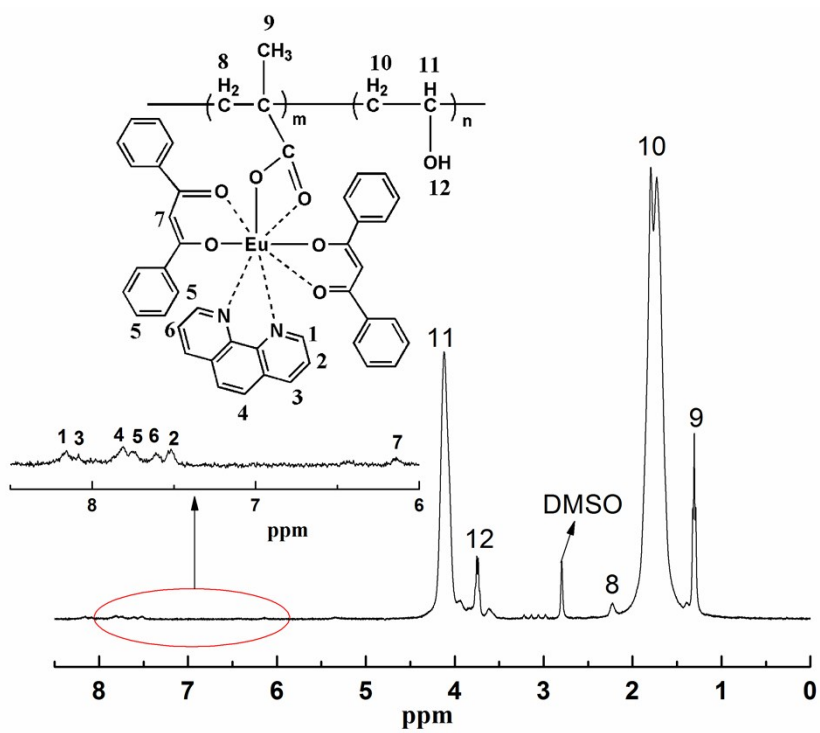

Fig. s4.

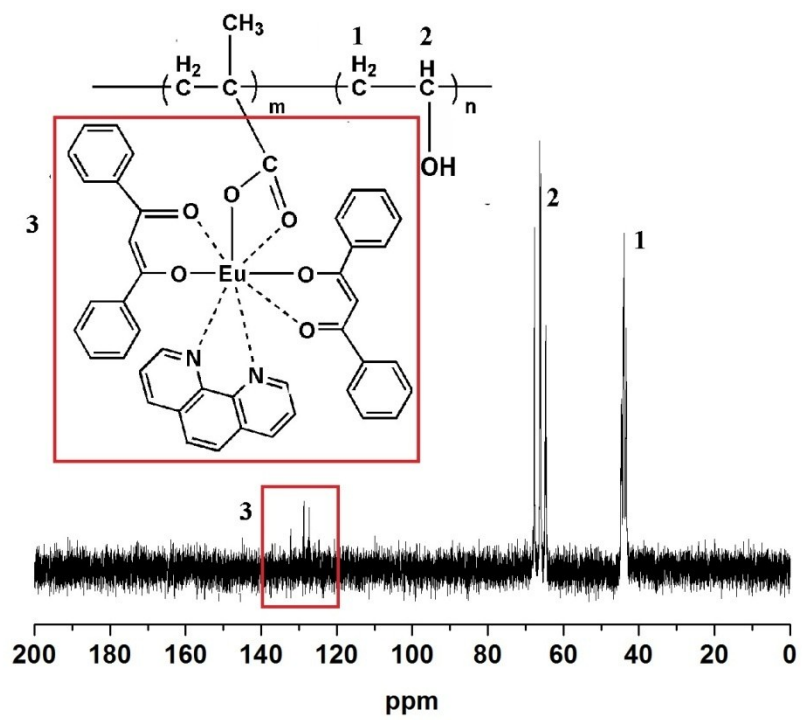

Fig. s5.

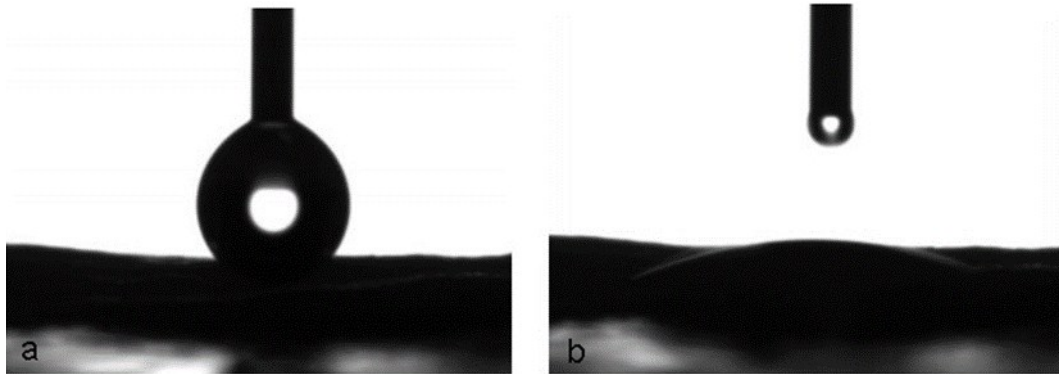

Fig. s6.

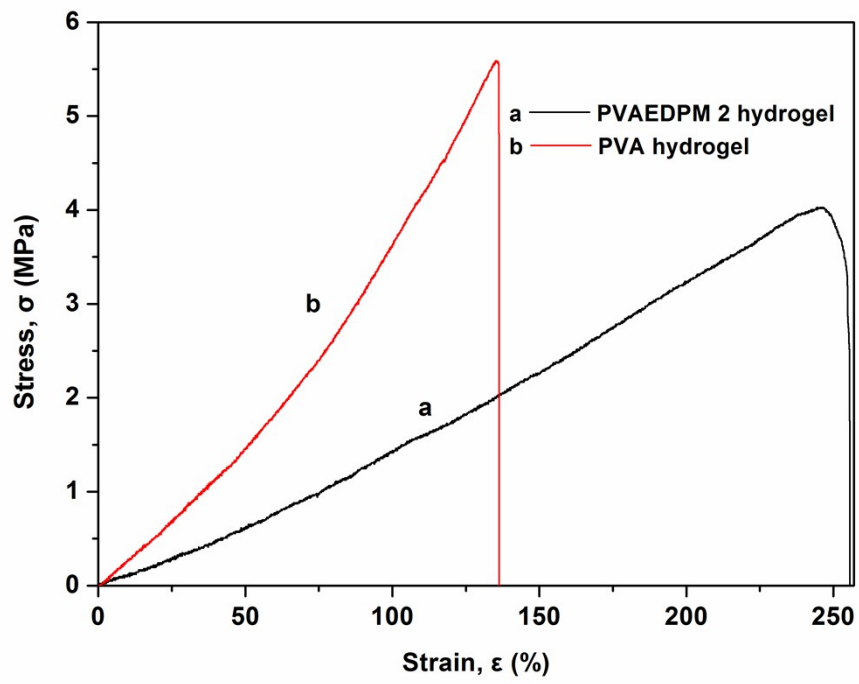

Table s1.

| Polymer   |       | Weight (g) |        |        |        |        | Water content (%) |
|-----------|-------|------------|--------|--------|--------|--------|-------------------|
| PVAEDPM 2 | $W_0$ | 0.0537     | 0.0902 | 0.0748 | 0.1643 | 0.2043 | 79.66±1.52        |
| hydrogels | $W_1$ | 0.0121     | 0.0172 | 0.0156 | 0.0337 | 0.0382 |                   |

$W_0$  is the weight of the PVAEDPM 2 hydrogels before drying

$W_1$  is the weight of the dried PVAEDPM 2 hydrogels



Table s2.

| Polymer             | Soaking times (d) |       | Weight (g) |        |        |        |        | Swelling ratio (%) |
|---------------------|-------------------|-------|------------|--------|--------|--------|--------|--------------------|
| PVAEDPM 2 hydrogels | 7                 | $W_0$ | 0.0121     | 0.0172 | 0.0156 | 0.0337 | 0.0382 | 283.8±38.58        |
|                     |                   | $W_1$ | 0.0432     | 0.0735 | 0.0652 | 0.1312 | 0.1271 |                    |
|                     | 14                | $W_0$ | 0.0123     | 0.0174 | 0.0159 | 0.0336 | 0.0383 | 289.2±35.60        |
|                     |                   | $W_1$ | 0.0452     | 0.0780 | 0.0632 | 0.1254 | 0.1381 |                    |
|                     | 21                | $W_0$ | 0.0122     | 0.0179 | 0.0155 | 0.0342 | 0.0388 | 346.6±22.50        |
|                     |                   | $W_1$ | 0.0513     | 0.0852 | 0.0715 | 0.1521 | 0.1671 |                    |
|                     | 28                | $W_0$ | 0.0124     | 0.0176 | 0.0160 | 0.0339 | 0.0391 | 354.8±28.12        |
|                     |                   | $W_1$ | 0.0516     | 0.0866 | 0.0712 | 0.1534 | 0.1831 |                    |

$W_0$  is the weight of the dried PVAEDPM 2 hydrogels

$W_1$  is the weight of the soaked PVAEDPM 2 hydrogels

Table s3.

| Lab. No | PVAEDPM 2 hydrogel<br>dry weight (g) | SBF volume(mL) | Eu <sup>3+</sup> concentration<br>(mg/L) |
|---------|--------------------------------------|----------------|------------------------------------------|
| 1       | 0.012                                | 10             | —                                        |
| 2       | 0.017                                | 10             | —                                        |
| 3       | 0.015                                | 10             | —                                        |
| 4       | 0.033                                | 10             | —                                        |
| 5       | 0.038                                | 10             | —                                        |

—, Not detected
